# Supplementary material
Source: publisher figshare collection journal article supplement (https://frontiersin.figshare.com/ndownloader/files/34424456)
Supplement: Supplementary file [file 34424456]

## Supplement 1:

### Contents of follow-up phone call by length of time since termination of delivery

| Duration of follow-up           | Questionnaire of follow-up                                                                                                                                                                                                                                                                                                                                                                                                                                                                                                                                                                                                                                                                                                                                                                                                                                                                                                                                                                                                                                                                                                                                                                                                                                                                                  |
|---------------------------------|-------------------------------------------------------------------------------------------------------------------------------------------------------------------------------------------------------------------------------------------------------------------------------------------------------------------------------------------------------------------------------------------------------------------------------------------------------------------------------------------------------------------------------------------------------------------------------------------------------------------------------------------------------------------------------------------------------------------------------------------------------------------------------------------------------------------------------------------------------------------------------------------------------------------------------------------------------------------------------------------------------------------------------------------------------------------------------------------------------------------------------------------------------------------------------------------------------------------------------------------------------------------------------------------------------------|
| Before delivery                 | 1) Progressive pregnancy: <input type="checkbox"/> yes , <input type="checkbox"/> no ; If “No” was answered, please complete the following question.<br>Reasons of termination:                                                                                                                                                                                                                                                                                                                                                                                                                                                                                                                                                                                                                                                                                                                                                                                                                                                                                                                                                                                                                                                                                                                             |
| 7 days after Delivery           | 1) Maternal complications: <input type="checkbox"/> yes , <input type="checkbox"/> no ; If “Yes” was answered, please complete following question.<br><input type="checkbox"/> abnormal of amniotic fluid, <input type="checkbox"/> abnormal of placenta, <input type="checkbox"/> gestational hypertension,<br><input type="checkbox"/> gestational diabetes, <input type="checkbox"/> preterm delivery, <input type="checkbox"/> others<br>2) Neonatal complications: <input type="checkbox"/> yes , <input type="checkbox"/> no ; If “Yes” was answered, please complete following question.<br><input type="checkbox"/> neonatal respiratory distress syndrome (NRDS), <input type="checkbox"/> asphyxia, <input type="checkbox"/> infection、 <input type="checkbox"/> Intracranial hemorrhage, <input type="checkbox"/><br>pathological jaundice, <input type="checkbox"/> others<br>3) Neonatal birth defects: <input type="checkbox"/> yes , <input type="checkbox"/> no ; If “Yes” was answered, please complete following question.<br><input type="checkbox"/> congenital heart disease, <input type="checkbox"/> genitourinary malformations, <input type="checkbox"/> nervous system malformations,<br><input type="checkbox"/> gastrointestinal malformations, <input type="checkbox"/> others |
| 1 /3 /5-years after<br>Delivery | 1) birth defects: <input type="checkbox"/> yes , <input type="checkbox"/> no ; If “Yes” was answered, please complete following question.<br><input type="checkbox"/> congenital heart disease, <input type="checkbox"/> genitourinary malformations, <input type="checkbox"/> nervous system malformations,<br><input type="checkbox"/> gastrointestinal malformations, <input type="checkbox"/> others<br>2) when the malformation was diagnosed:<br>3) treatment methods:                                                                                                                                                                                                                                                                                                                                                                                                                                                                                                                                                                                                                                                                                                                                                                                                                                |

number
